# Supplementary material for: Uncovering the encapsulation effect of reduced graphene oxide sheets on the hydrogen storage properties of palladium nanocubes
Source: Royal Society of Chemistry journal article supplement (doi:10.1039/d1nr04335h), 2021-01-01
Supplement: d1nr04335h1.pdf [file d1nr04335h1.pdf]

## Supporting Information

### **Uncovering the Encapsulation Effect of Reduced Graphene Oxide Sheets on Hydrogen Storage Properties of Palladium Nanocubes**

Jinseok Koh,<sup>a</sup> Eunho Choi,<sup>b</sup> Kouji Sakaki,<sup>c</sup> Daeho Kim,<sup>d</sup> Seung Min Han,<sup>d</sup> Sangtae Kim,<sup>\*b</sup> and  
Eun Seon Cho<sup>\*a</sup>

<sup>a</sup> *Department of Chemical and Biomolecular Engineering, Korea Advanced Institute of Science and Technology (KAIST), Daejeon 34141, Republic of Korea*

<sup>b</sup> *Department of Nuclear Engineering, Hanyang University, Seoul 04763, Republic of Korea*

<sup>c</sup> *Energy Process Research Institute, National Institute of Advanced Industrial Science and Technology (AIST), 16-1 Onogawa, Tsukuba, Ibaraki 305-8569, Japan*

<sup>d</sup> *Department of Materials Science and Engineering, Korea Advanced Institute of Science and Technology (KAIST), Daejeon 34141, Republic of Korea*

#### **Corresponding Authors**

\*Email: sangtae@hanyang.ac.kr (S. Kim)

\*Email: escho@kaist.ac.kr (E. S. Cho)

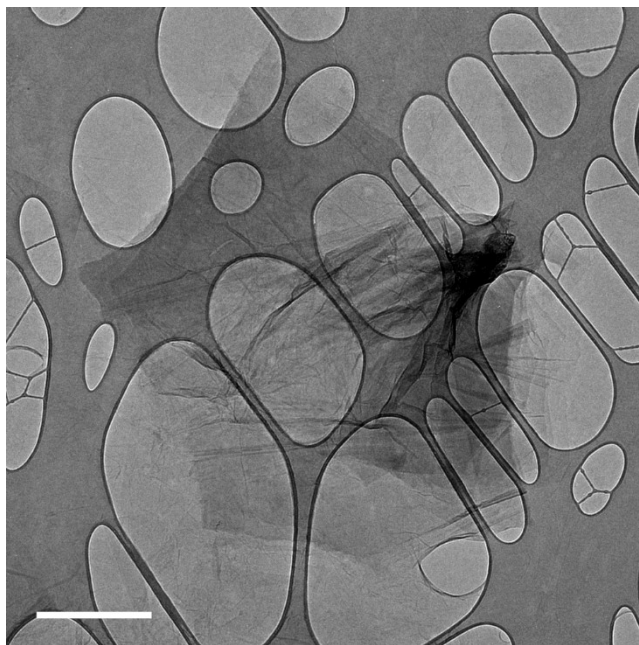

**Fig. S1** TEM image of the neat GO sheets which are well exfoliated (the scale bar is 1 $\mu$ m).

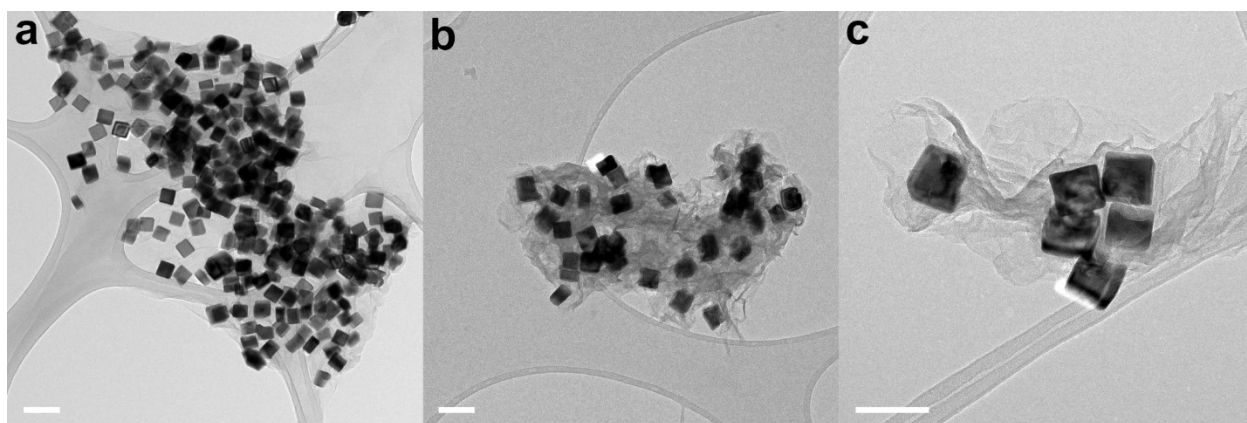

**Fig. S2** Low magnified TEM images of (a) rGO-Pd1, (b) rGO-Pd2, and (c) rGO-Pd3 (the scale bar is 100 nm).

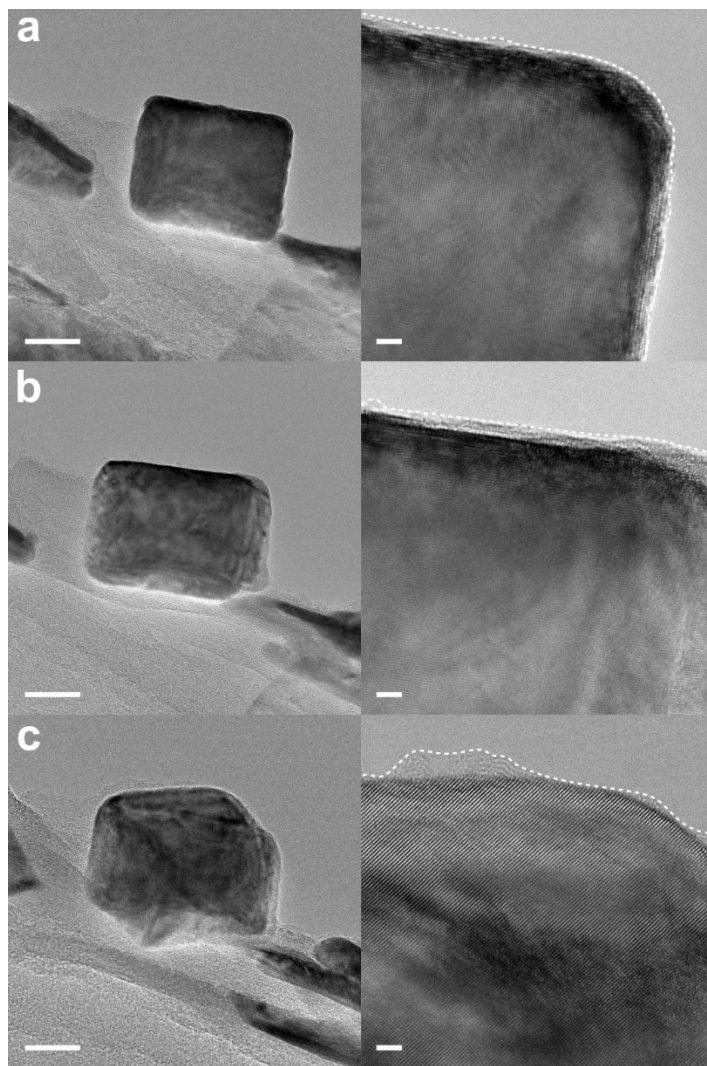

**Fig. S3** HRTEM images of rGO-Pd2 oriented along the (a) [001], (b) [013], and (c) [112] zone axis (the scale bars indicate 20 nm). The right panels show the magnified views of the corresponding Pd nanocube (the scale bars represent 2 nm). White dashed lines represent the outermost rGO layers.

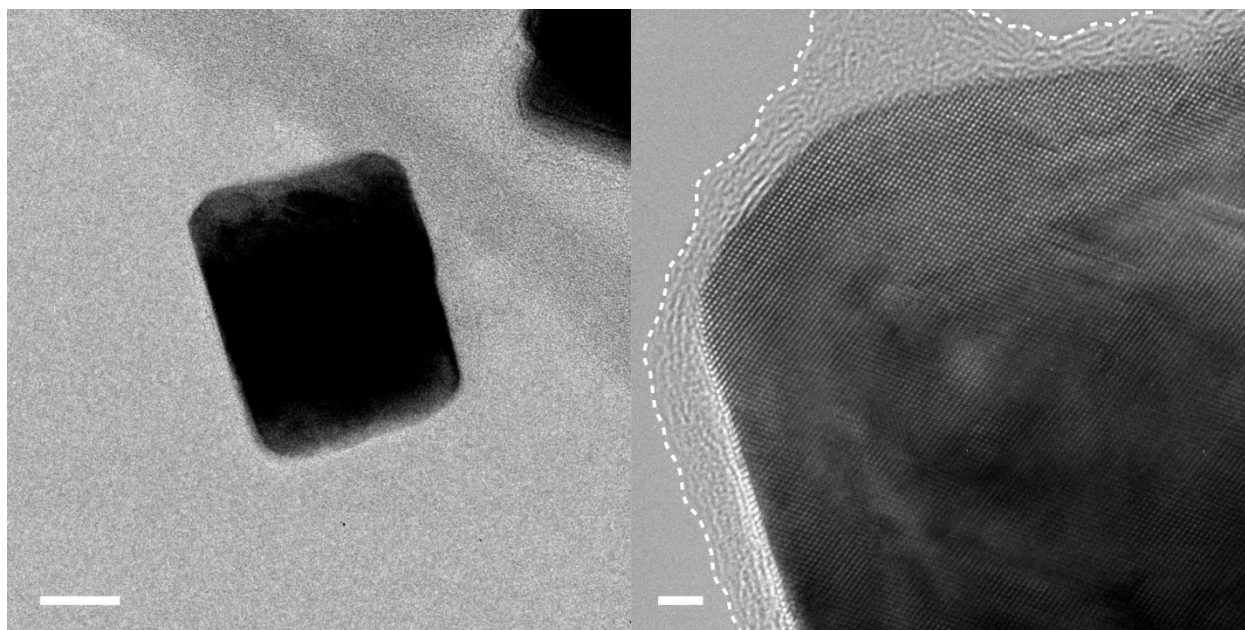

**Fig. S4** (Left) HRTEM image of the [110] zone axis oriented Pd nanocube from another rGO-Pd<sub>2</sub> sample (the scale bar is 20 nm). (Right) The magnified view of the Pd nanocube shows the layered-encapsulating structure (the scale bar is 2 nm).

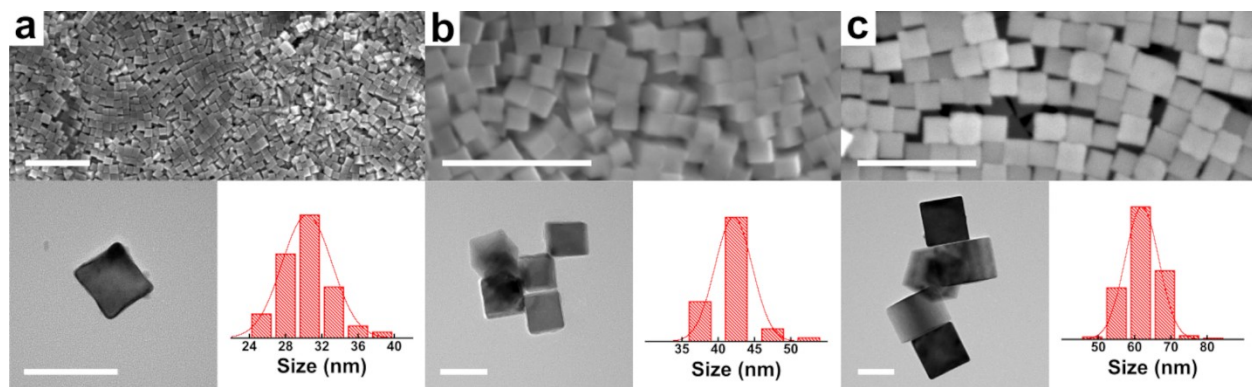

**Fig. S5.** SEM (upper panel; the scale bars represent 300 nm) and TEM (lower panel; the scale bars indicate 50 nm) images of bare-Pd nanocubes with an edge size of (a)  $30.4 \pm 2.8$  nm, (b)  $42.1 \pm 2.6$  nm, and (c)  $62.0 \pm 4.6$  nm with their size distributions.

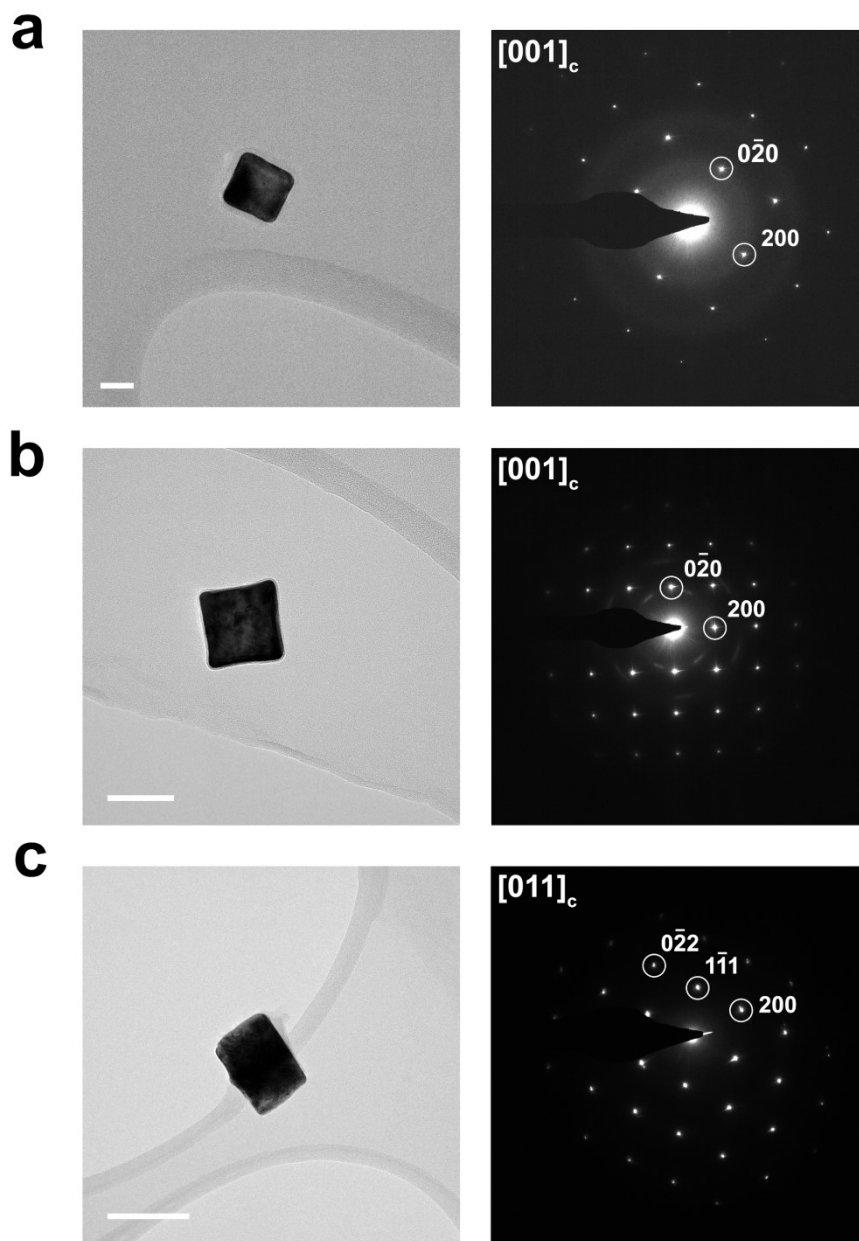

**Fig. S6** TEM images (left) and the corresponding SAED patterns (right) of (a) rGO-Pd1, (b) rGO-Pd2, and (c) rGO-Pd3 (the scale bars indicate 20 nm, 50 nm, and 100 nm, respectively).

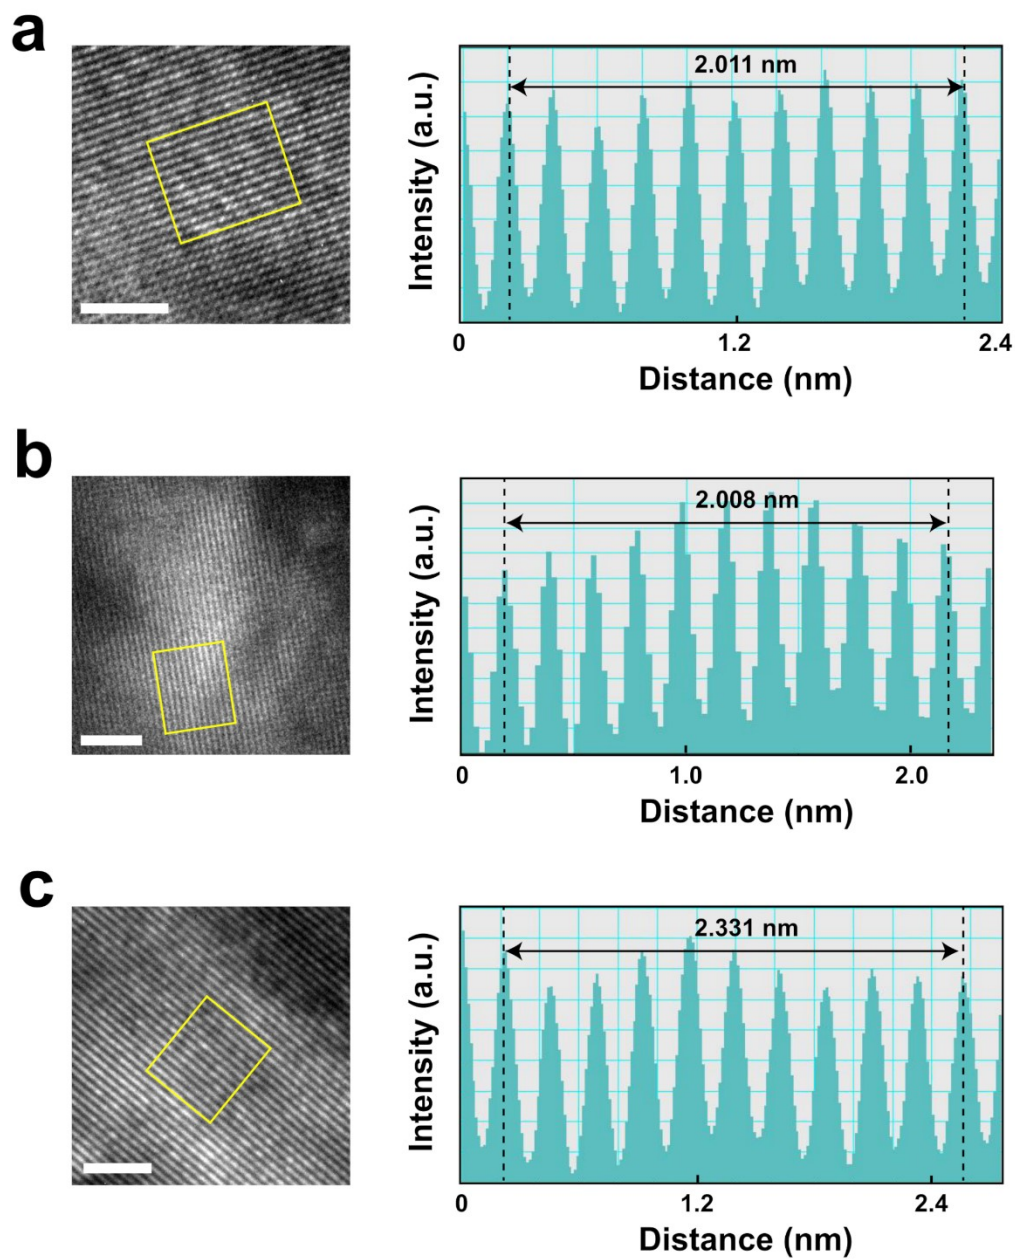

**Fig. S7** HRTEM images (left) and the corresponding lattice spacing intensity profiles (right) of (a) rGO-Pd1, (b) rGO-Pd2, and (c) rGO-Pd3 (all scale bars indicate 2 nm).



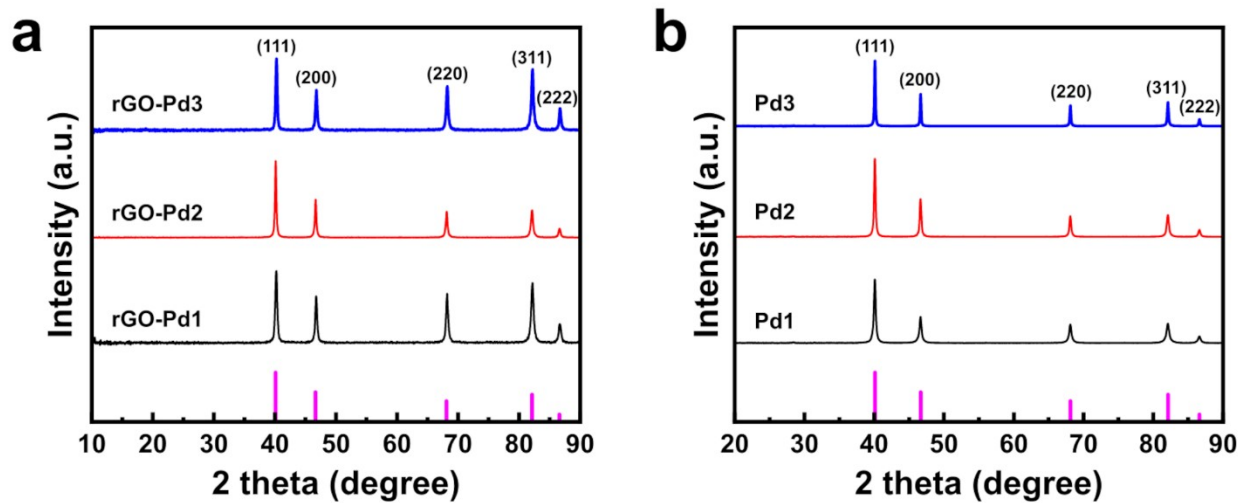

**Fig. S8** XRD patterns of (a) rGO-Pd and (b) bare-Pd nanocubes; the bottom bars show peak positions of XRD pattern of bulk Pd with FCC structure (PDF # 00-046-1043).

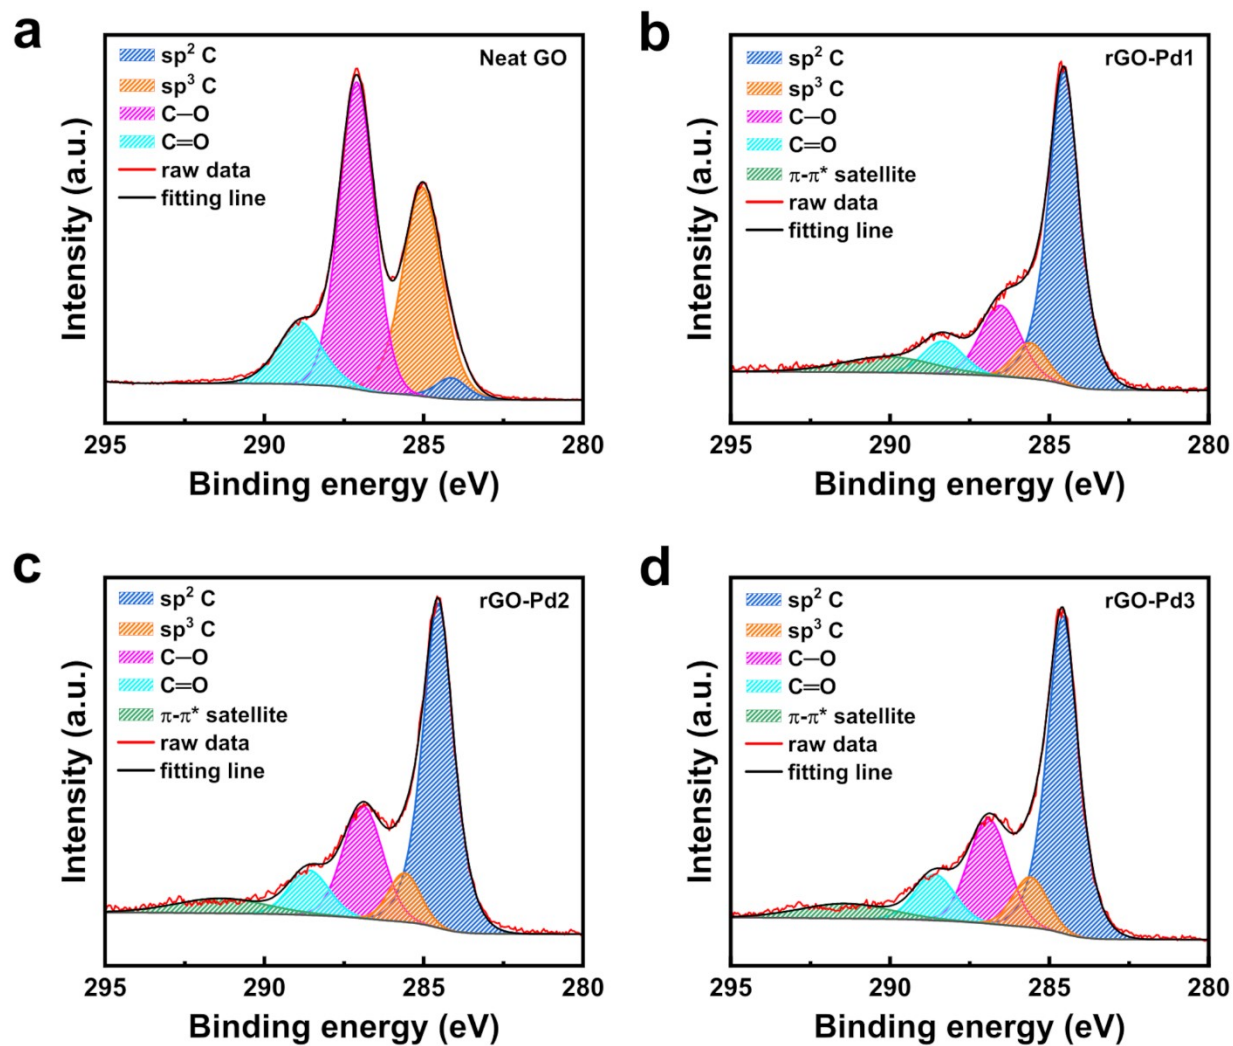

**Fig. S9** C 1s XPS spectra from (a) neat GO and (b-d) rGO-Pd nanocubes.

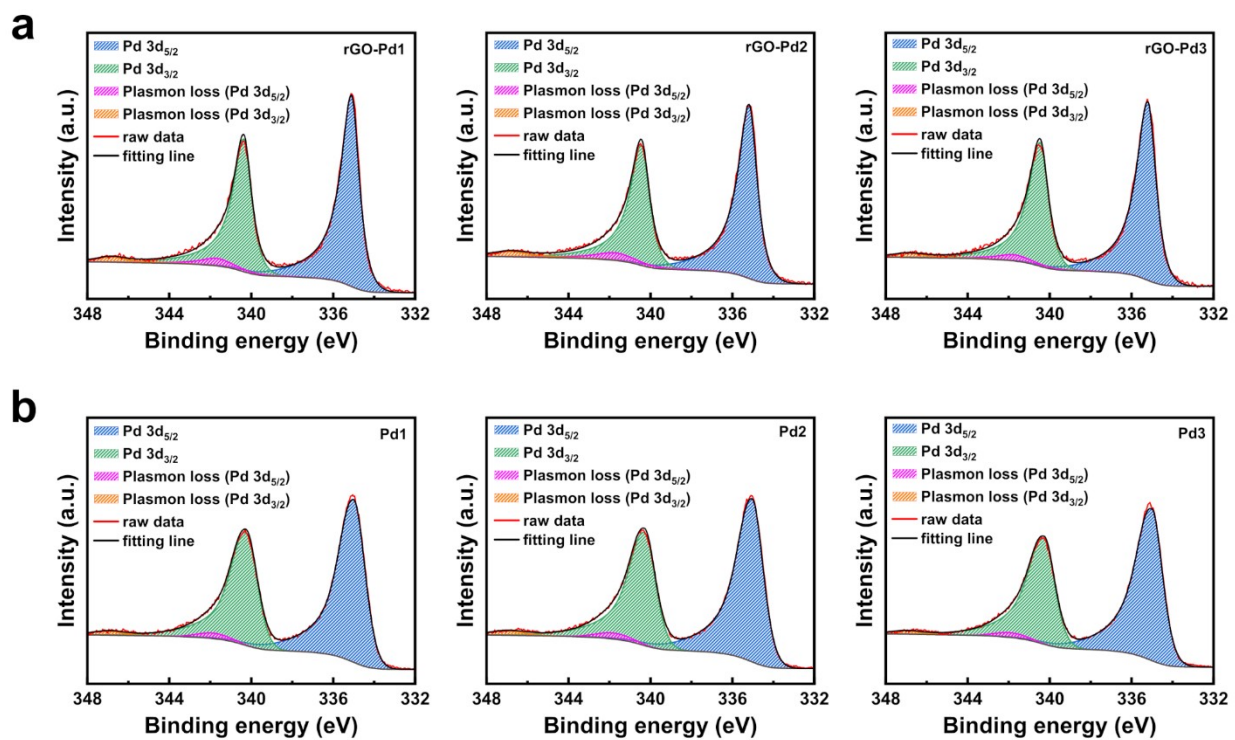

**Fig. S10** Pd 3d XPS spectra from (a) rGO-Pd and (b) bare-Pd nanocubes. The binding energies of both Pd 3d<sub>5/2</sub> and Pd 3d<sub>3/2</sub> peaks are barely changed within 0.2 eV, indicating a weak electron transfer.

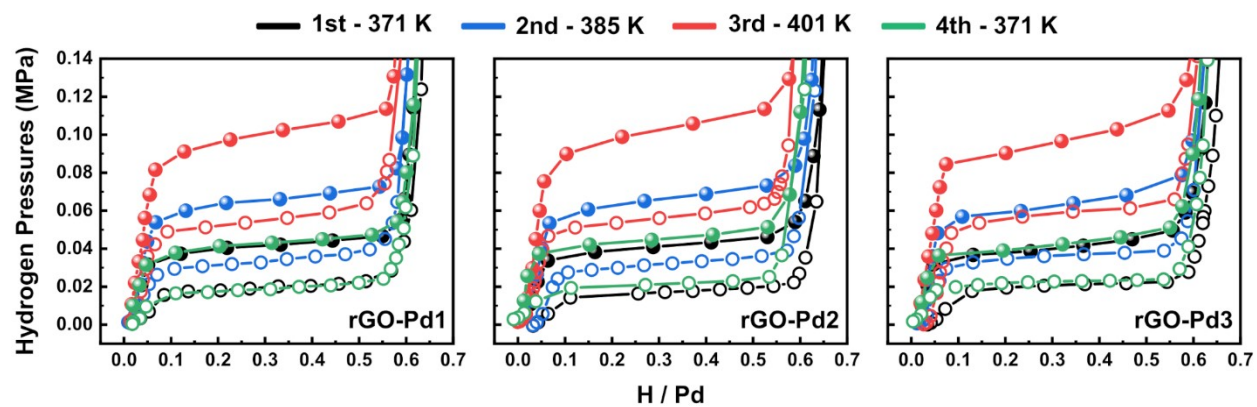

**Fig. S11** PC isotherms of rGO-Pd samples during multiple hydrogen sorption cycles at 371 K, 385 K, and 401 K. Repeated experiments even after the high temperature cycle (3rd-401 K) show nearly identical de/hydring profiles (1st-371K and 4th-371K).

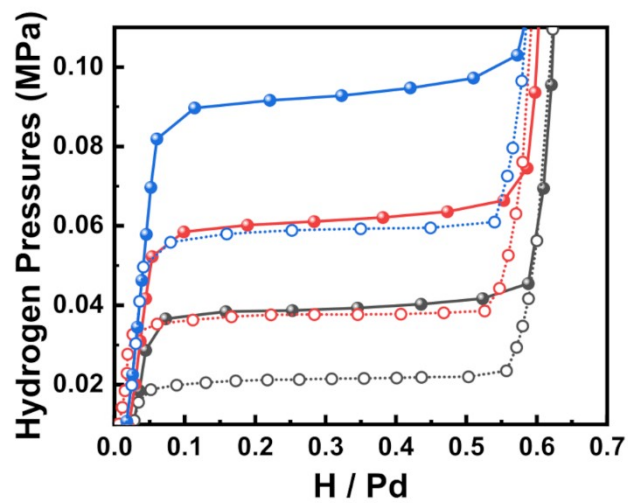

**Fig. S12** PC isotherms of bulk Pd at 371 K (black line), 385 K (red line), and 401 K (blue line) during absorption (solid circle) and desorption (open circle) process.

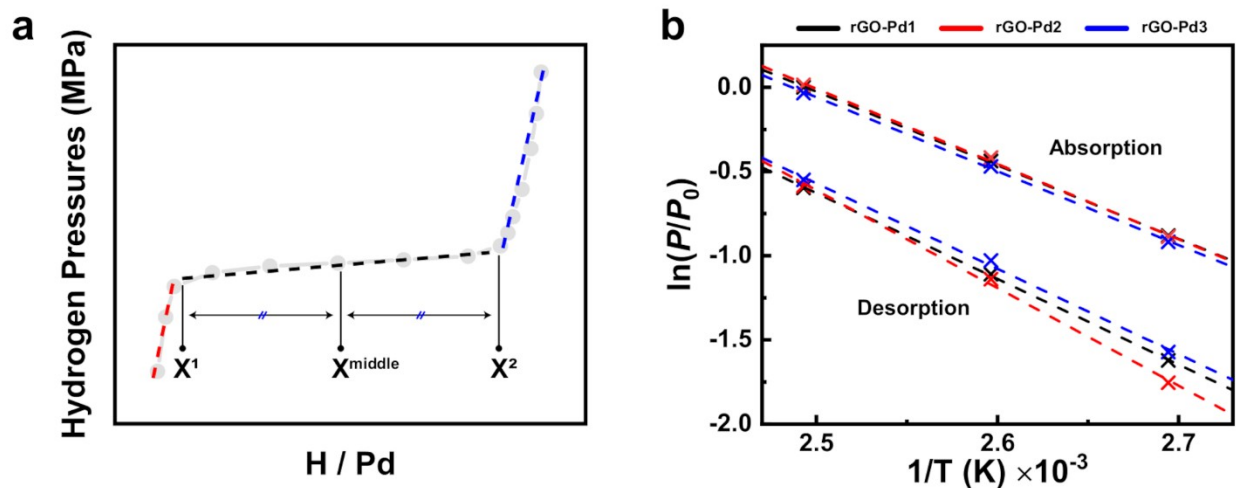

**Fig. S13** (a) Abbreviated PC isotherms which schematically present the procedure for determining the plateau pressure. The isotherm can be divided into three regions: solid solution ( $\alpha$ -phase), transition region, hydrogen-rich region ( $\beta$ -phase). We fitted each region using linear regression and found the intersection points of adjacent phases ( $X^1$  and  $X^2$ ). With the middle of two points ( $X^{\text{middle}}$ ), the plateau pressure was obtained. (b) The van't Hoff plots fitted from isotherm data of rGO-Pd.

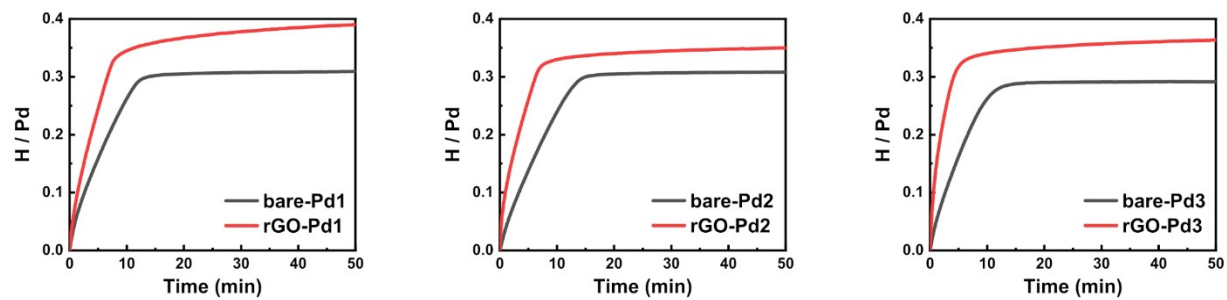

**Fig. S14** Hydrogen absorption at 303 K under 1.3 bar of  $H_2$  pressure for rGO-Pd and bare-Pd nanocubes.

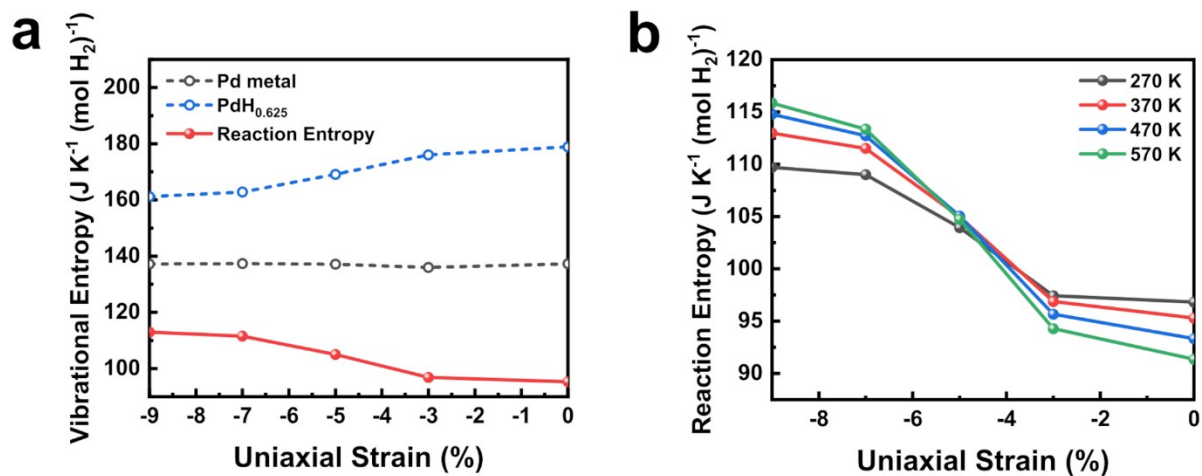

**Fig. S15** (a) Computed reaction entropy and vibrational entropy of PdH<sub>0.625</sub> and Pd at the varied uniaxial compression from 0 to 9 %, while allowing Poisson expansion. (b) Desorption entropy computed at varied temperatures between 270 K and 570 K under uniaxial compression.
